# Supplementary material for: Metal-free high-adsorption-capacity adsorbent derived from spent coffee grounds for methylene blue
Source: Royal Society of Chemistry journal article supplement (doi:10.1039/d0ra09550h), 2021-01-01
Supplement: d0ra09550h1.pdf [file d0ra09550h1.pdf]

Supplementary Information

**Metal-free high-adsorption-capacity adsorbent derived from spent coffee grounds for methylene blue**

**Bayaraa Sukhbaatar, Bongyoung Yoo, and Jae-Hong Lim**

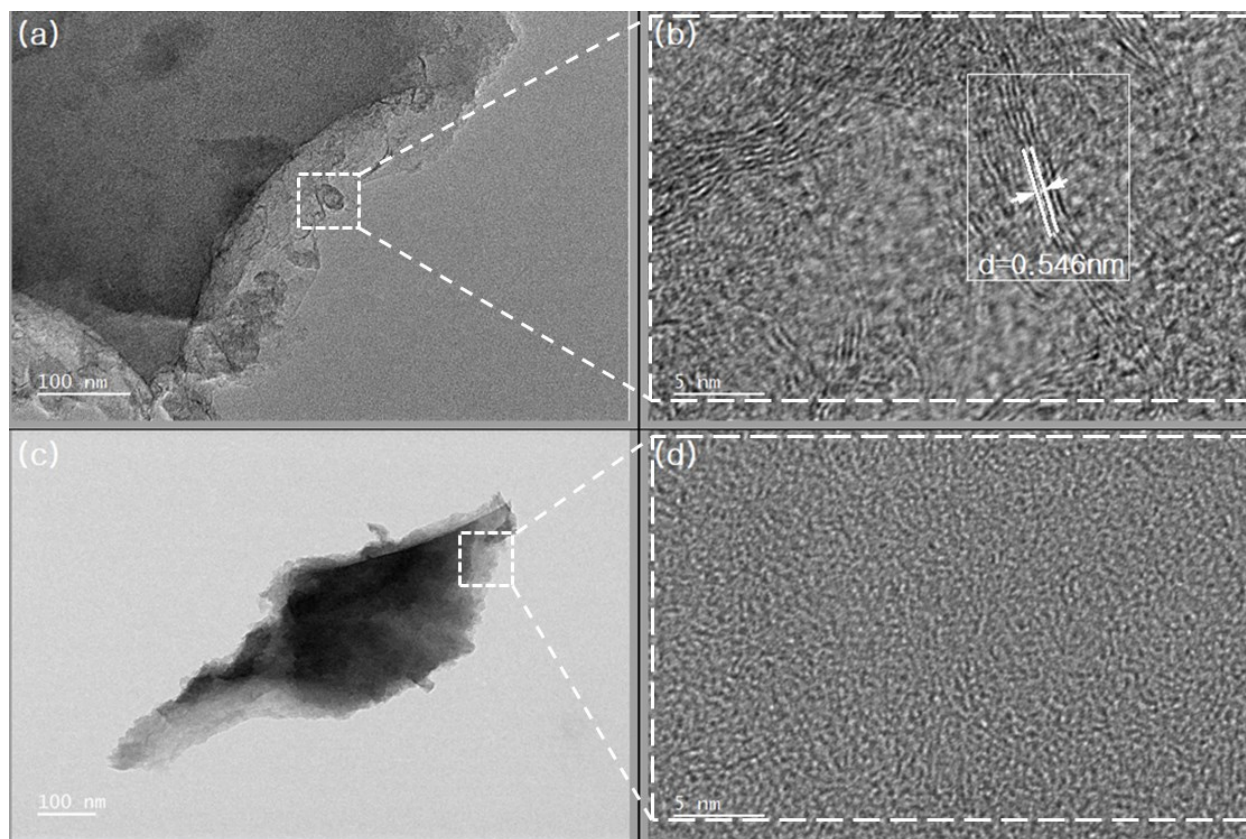

**Fig. S1.** TEM images of (a, b) SCG-KU, the combined urea and KOH activation product of spent coffee grounds and (c, d) SCG-K, the product of the activation of spent coffee grounds by KOH.

Contact time : 0    20    40    60    100    140    160 min.

SCG-Na

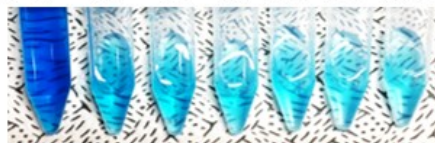

SCG-NaU

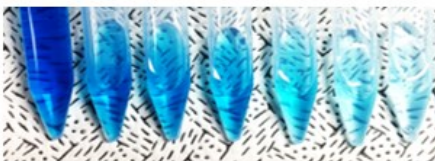

SCG-K

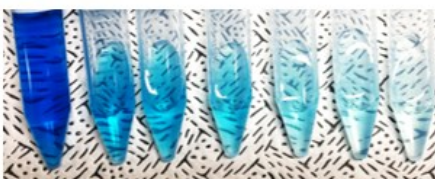

SCG-KU

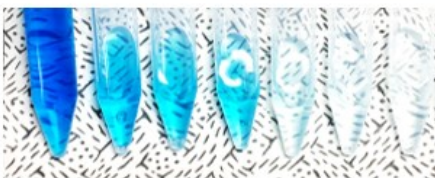

**Fig. S2.** Photographs of MB solutions acquired at specific contact times after the addition of MB adsorbents SCG-Na, SCG-NaU, SCG-K and SCG-KU, from left to right: 20 min, 40 min, 60 min, 80 min, 120 min, 140 min, and 180 min (initial MB concentration: 200 mg/L, adsorbent dosage: 300 mg/L).

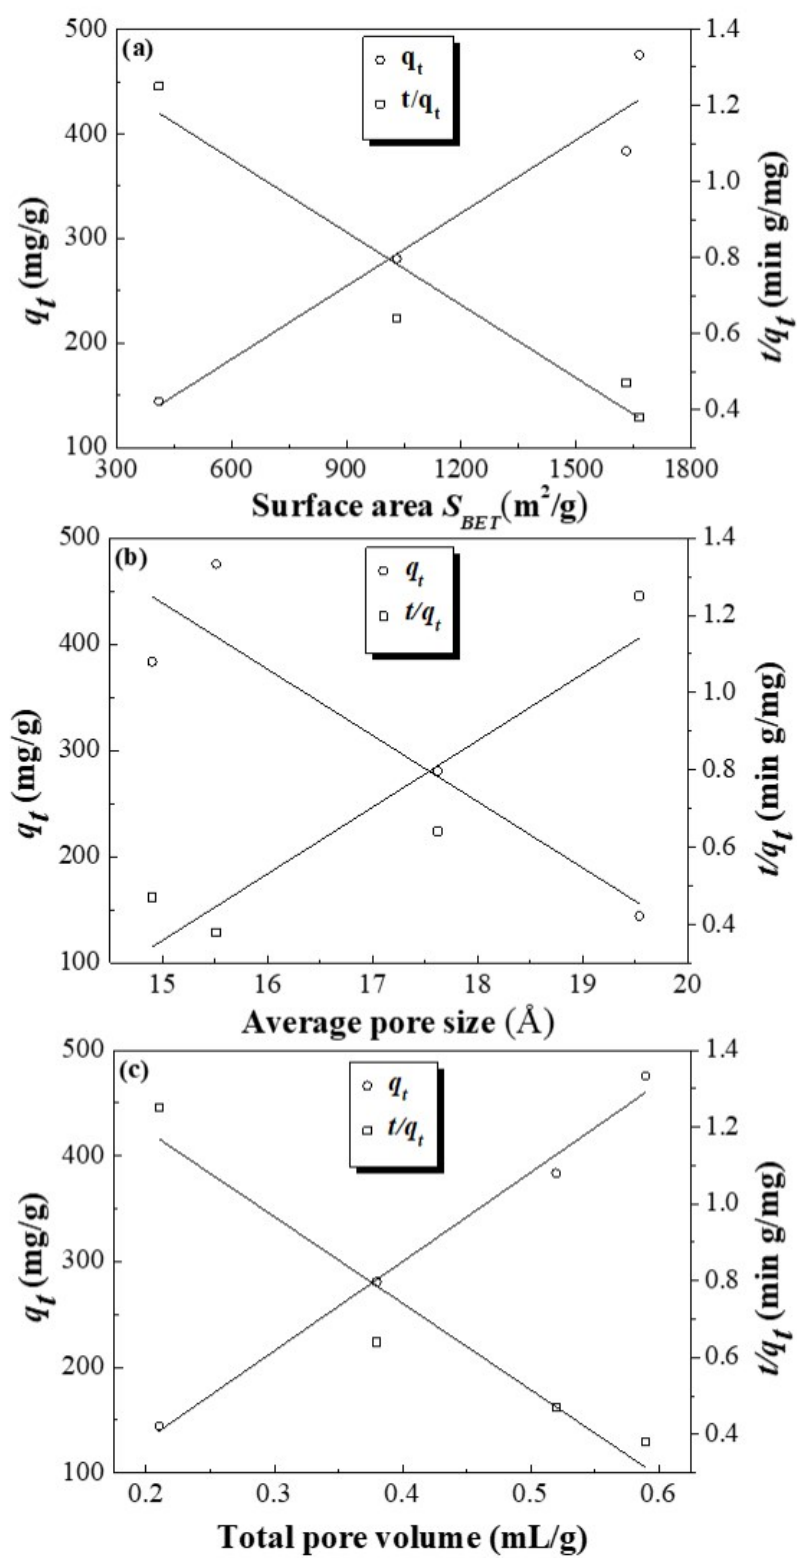

**Fig. S3.** Relationships between adsorption capacity of carbon materials and (a) surface area, (b) average pore size, and (c) total pore volume.

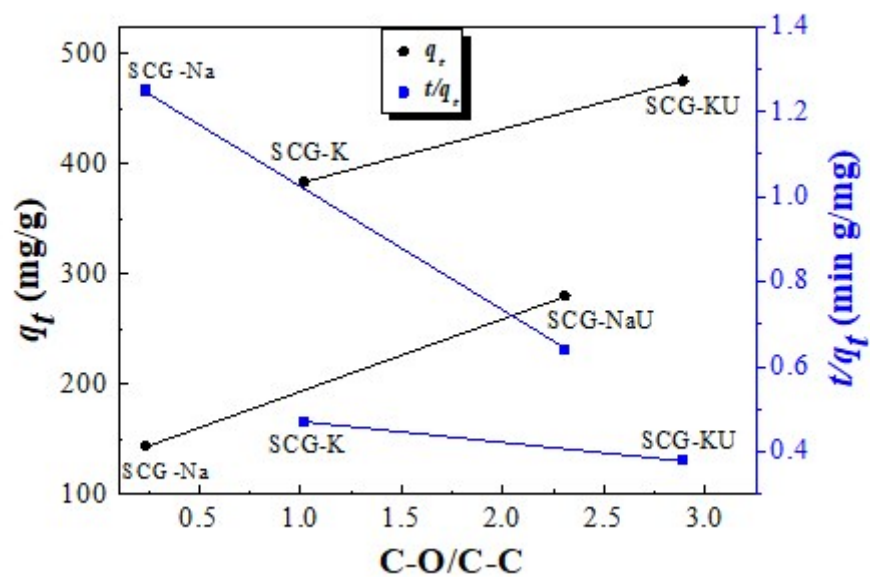

**Fig. S4.** Effect of C–O content on the adsorption capacity of carbon materials.

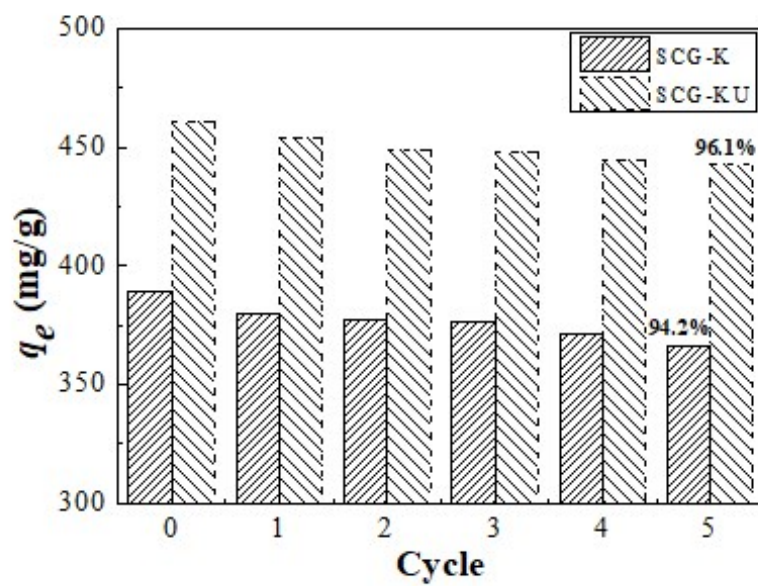

**Fig. S5.** Recovery performance of SCG-K and SCG-KU for MB adsorption.
